# Supplementary material for: Elucidating the structure of the graphitic carbon nitride nanomaterials via X-ray photoelectron spectroscopy and X-ray powder diffraction techniques
Source: Royal Society of Chemistry journal article supplement (doi:10.1039/d0dt02325f), 2020-01-01
Supplement: d0dt02325f1.pdf [file d0dt02325f1.pdf]

**Electronic Supplementary Information for**

**Elucidating the structure of the graphitic carbon nitride nanomaterials  
using X-ray photoelectron spectroscopy  
and X-ray powder diffraction techniques**

Emilia Alwin<sup>a,b</sup>, Waldemar Nowicki<sup>a</sup>, Robert Wojcieszak<sup>b</sup>, Michał Zieliński<sup>a</sup> and Mariusz Pietrowski<sup>a\*</sup>

<sup>a</sup> Faculty of Chemistry, Adam Mickiewicz University in Poznań, Uniwersytetu Poznańskiego 8, 61-614 Poznań, Poland.

<sup>b</sup> Univ. Lille, CNRS, Centrale Lille, Univ. Artois, UMR 8181 - UCCS - Unité de Catalyse et Chimie du Solide, F-59000 Lille, France.

<sup>c</sup> \*E-mail: mariop@amu.edu.pl

**The structure models used for the refinement of gCN**

**1. gCN P21212\_500C**

#=====

# CRYSTAL DATA

#-----

data\_gCxNyHz P21212\_500C

|                           |             |
|---------------------------|-------------|
| _chemical_name_common     | "           |
| _cell_length_a            | 16.35200    |
| _cell_length_b            | 12.49700    |
| _cell_length_c            | 6.5018      |
| _cell_angle_alpha         | 90          |
| _cell_angle_beta          | 90          |
| _cell_angle_gamma         | 90          |
| _space_group_name_H-M_alt | 'P 21 21 2' |
| _space_group_IT_number    | 18          |

loop\_

\_space\_group\_symop\_operation\_xyz

'x, y, z'

'-x, -y, z'

'-x+1/2, y+1/2, -z'

'x+1/2, -y+1/2, -z'

loop\_

\_atom\_site\_label

\_atom\_site\_occupancy

\_atom\_site\_fract\_x

\_atom\_site\_fract\_y

\_atom\_site\_fract\_z

\_atom\_site\_adp\_type

\_atom\_site\_U\_iso\_or\_equiv

\_atom\_site\_type\_symbol

|     |     |          |          |          |      |          |   |
|-----|-----|----------|----------|----------|------|----------|---|
| C1  | 1.0 | 0.344800 | 0.472000 | 0.250000 | Uiso | 0.012700 | C |
| C2  | 1.0 | 0.655200 | 0.528000 | 0.250000 | Uiso | 0.012700 | C |
| C3  | 1.0 | 0.221600 | 0.798000 | 0.250000 | Uiso | 0.012700 | C |
| C4  | 1.0 | 0.778400 | 0.202000 | 0.250000 | Uiso | 0.012700 | C |
| C5  | 1.0 | 0.269500 | 0.630000 | 0.250000 | Uiso | 0.012700 | C |
| C6  | 1.0 | 0.730500 | 0.370000 | 0.250000 | Uiso | 0.012700 | C |
| C7  | 1.0 | 0.136100 | 0.648000 | 0.250000 | Uiso | 0.012700 | C |
| C8  | 1.0 | 0.864000 | 0.352000 | 0.250000 | Uiso | 0.012700 | C |
| C9  | 1.0 | 0.987200 | 0.683000 | 0.250000 | Uiso | 0.012700 | C |
| C10 | 1.0 | 0.012800 | 0.317000 | 0.250000 | Uiso | 0.012700 | C |
| C11 | 1.0 | 0.072900 | 0.820000 | 0.250000 | Uiso | 0.012700 | C |
| C12 | 1.0 | 0.927100 | 0.180000 | 0.250000 | Uiso | 0.012700 | C |
| C13 | 1.0 | 0.834400 | 0.028000 | 0.250000 | Uiso | 0.012700 | C |
| C14 | 1.0 | 0.165600 | 0.972000 | 0.250000 | Uiso | 0.012700 | C |
| C15 | 1.0 | 0.711200 | 0.702000 | 0.250000 | Uiso | 0.012700 | C |

|     |     |          |          |          |      |          |   |
|-----|-----|----------|----------|----------|------|----------|---|
| C16 | 1.0 | 0.288800 | 0.298000 | 0.250000 | Uiso | 0.012700 | C |
| C17 | 1.0 | 0.759100 | 0.870000 | 0.250000 | Uiso | 0.012700 | C |
| C18 | 1.0 | 0.240900 | 0.130000 | 0.250000 | Uiso | 0.012700 | C |
| C19 | 1.0 | 0.625700 | 0.852000 | 0.250000 | Uiso | 0.012700 | C |
| C20 | 1.0 | 0.374300 | 0.148000 | 0.250000 | Uiso | 0.012700 | C |
| C21 | 1.0 | 0.478000 | 0.817000 | 0.250000 | Uiso | 0.012700 | C |
| C22 | 1.0 | 0.522000 | 0.183000 | 0.250000 | Uiso | 0.012700 | C |
| C23 | 1.0 | 0.562500 | 0.680000 | 0.250000 | Uiso | 0.012700 | C |
| C24 | 1.0 | 0.437500 | 0.320000 | 0.250000 | Uiso | 0.012700 | C |
| H1  | 1.0 | 0.874900 | 0.889100 | 0.250000 | Uiso | 0.012700 | H |
| H2  | 1.0 | 0.125100 | 0.110900 | 0.250000 | Uiso | 0.012700 | H |
| H3  | 1.0 | 0.385300 | 0.610900 | 0.250000 | Uiso | 0.012700 | H |
| H4  | 1.0 | 0.614700 | 0.389100 | 0.250000 | Uiso | 0.012700 | H |
| H5  | 1.0 | 0.916500 | 0.557600 | 0.250000 | Uiso | 0.012700 | H |
| H6  | 1.0 | 0.083500 | 0.442400 | 0.250000 | Uiso | 0.012700 | H |
| H7  | 1.0 | 0.407300 | 0.942400 | 0.250000 | Uiso | 0.012700 | H |
| H8  | 1.0 | 0.592700 | 0.057600 | 0.250000 | Uiso | 0.012700 | H |
| H9  | 1.0 | 0.358300 | 0.821700 | 0.250000 | Uiso | 0.012700 | H |
| H10 | 1.0 | 0.641700 | 0.178300 | 0.250000 | Uiso | 0.012700 | H |
| H11 | 1.0 | 0.867400 | 0.678300 | 0.250000 | Uiso | 0.012700 | H |
| H12 | 1.0 | 0.132600 | 0.321700 | 0.250000 | Uiso | 0.012700 | H |
| N1  | 1.0 | 0.142200 | 0.762000 | 0.250000 | Uiso | 0.012700 | N |
| N2  | 1.0 | 0.857800 | 0.238000 | 0.250000 | Uiso | 0.012700 | N |
| N3  | 1.0 | 0.088200 | 0.935000 | 0.250000 | Uiso | 0.012700 | N |
| N4  | 1.0 | 0.911800 | 0.065000 | 0.250000 | Uiso | 0.012700 | N |
| N5  | 1.0 | 0.226700 | 0.904000 | 0.250000 | Uiso | 0.012700 | N |
| N6  | 1.0 | 0.773300 | 0.096000 | 0.250000 | Uiso | 0.012700 | N |
| N7  | 1.0 | 0.282700 | 0.733000 | 0.250000 | Uiso | 0.012700 | N |
| N8  | 1.0 | 0.717300 | 0.267000 | 0.250000 | Uiso | 0.012700 | N |
| N9  | 1.0 | 0.198200 | 0.588000 | 0.250000 | Uiso | 0.012700 | N |

|     |     |          |          |          |      |          |   |
|-----|-----|----------|----------|----------|------|----------|---|
| N10 | 1.0 | 0.801800 | 0.412000 | 0.250000 | Uiso | 0.012700 | N |
| N11 | 1.0 | 0.057600 | 0.608000 | 0.250000 | Uiso | 0.012700 | N |
| N12 | 1.0 | 0.942300 | 0.392000 | 0.250000 | Uiso | 0.012700 | N |
| N13 | 1.0 | 0.997300 | 0.788000 | 0.250000 | Uiso | 0.012700 | N |
| N14 | 1.0 | 0.002700 | 0.212000 | 0.250000 | Uiso | 0.012700 | N |
| N15 | 1.0 | 0.333600 | 0.568000 | 0.250000 | Uiso | 0.012700 | N |
| N16 | 1.0 | 0.666400 | 0.432000 | 0.250000 | Uiso | 0.012700 | N |
| N17 | 1.0 | 0.921000 | 0.638000 | 0.250000 | Uiso | 0.012700 | N |
| N18 | 1.0 | 0.079000 | 0.362000 | 0.250000 | Uiso | 0.012700 | N |
| N19 | 1.0 | 0.631800 | 0.738000 | 0.250000 | Uiso | 0.012700 | N |
| N20 | 1.0 | 0.368200 | 0.262000 | 0.250000 | Uiso | 0.012700 | N |
| N21 | 1.0 | 0.577800 | 0.565000 | 0.250000 | Uiso | 0.012700 | N |
| N22 | 1.0 | 0.422200 | 0.435000 | 0.250000 | Uiso | 0.012700 | N |
| N23 | 1.0 | 0.716300 | 0.596000 | 0.250000 | Uiso | 0.012700 | N |
| N24 | 1.0 | 0.283700 | 0.404000 | 0.250000 | Uiso | 0.012700 | N |
| N25 | 1.0 | 0.772300 | 0.767000 | 0.250000 | Uiso | 0.012700 | N |
| N26 | 1.0 | 0.227700 | 0.233000 | 0.250000 | Uiso | 0.012700 | N |
| N27 | 1.0 | 0.687800 | 0.912000 | 0.250000 | Uiso | 0.012700 | N |
| N28 | 1.0 | 0.312200 | 0.088000 | 0.250000 | Uiso | 0.012700 | N |
| N29 | 1.0 | 0.547300 | 0.892000 | 0.250000 | Uiso | 0.012700 | N |
| N30 | 1.0 | 0.452700 | 0.108000 | 0.250000 | Uiso | 0.012700 | N |
| N31 | 1.0 | 0.488200 | 0.712000 | 0.250000 | Uiso | 0.012700 | N |
| N32 | 1.0 | 0.511800 | 0.288000 | 0.250000 | Uiso | 0.012700 | N |
| N33 | 1.0 | 0.823200 | 0.932000 | 0.250000 | Uiso | 0.012700 | N |
| N34 | 1.0 | 0.176800 | 0.068000 | 0.250000 | Uiso | 0.012700 | N |
| N35 | 1.0 | 0.411800 | 0.862000 | 0.250000 | Uiso | 0.012700 | N |
| N36 | 1.0 | 0.588200 | 0.138000 | 0.250000 | Uiso | 0.012700 | N |

## 2. gCN P21212\_550C

#=====

# CRYSTAL DATA

#-----

data\_gCNyHz P21212\_550C

\_chemical\_name\_common            "  
\_cell\_length\_a                    16.26400  
\_cell\_length\_b                    12.38600  
\_cell\_length\_c                    6.46820  
\_cell\_angle\_alpha                 90  
\_cell\_angle\_beta                  90  
\_cell\_angle\_gamma                 90  
\_space\_group\_name\_H-M\_alt         'P 21 21 2'  
\_space\_group\_IT\_number            18

loop\_

\_space\_group\_symop\_operation\_xyz

'x, y, z'

'-x, -y, z'

'-x+1/2, y+1/2, -z'

'x+1/2, -y+1/2, -z'

loop\_

\_atom\_site\_label

\_atom\_site\_occupancy

\_atom\_site\_fract\_x

\_atom\_site\_fract\_y

\_atom\_site\_fract\_z

\_atom\_site\_adp\_type

\_atom\_site\_U\_iso\_or\_equiv

\_atom\_site\_type\_symbol

|     |     |          |          |          |      |          |   |
|-----|-----|----------|----------|----------|------|----------|---|
| C1  | 1.0 | 0.344800 | 0.472000 | 0.250000 | Uiso | 0.012700 | C |
| C2  | 1.0 | 0.655200 | 0.528000 | 0.250000 | Uiso | 0.012700 | C |
| C3  | 1.0 | 0.221600 | 0.798000 | 0.250000 | Uiso | 0.012700 | C |
| C4  | 1.0 | 0.778400 | 0.202000 | 0.250000 | Uiso | 0.012700 | C |
| C5  | 1.0 | 0.269500 | 0.630000 | 0.250000 | Uiso | 0.012700 | C |
| C6  | 1.0 | 0.730500 | 0.370000 | 0.250000 | Uiso | 0.012700 | C |
| C7  | 1.0 | 0.136100 | 0.648000 | 0.250000 | Uiso | 0.012700 | C |
| C8  | 1.0 | 0.864000 | 0.352000 | 0.250000 | Uiso | 0.012700 | C |
| C9  | 1.0 | 0.987200 | 0.683000 | 0.250000 | Uiso | 0.012700 | C |
| C10 | 1.0 | 0.012800 | 0.317000 | 0.250000 | Uiso | 0.012700 | C |
| C11 | 1.0 | 0.072900 | 0.820000 | 0.250000 | Uiso | 0.012700 | C |
| C12 | 1.0 | 0.927100 | 0.180000 | 0.250000 | Uiso | 0.012700 | C |
| C13 | 1.0 | 0.834400 | 0.028000 | 0.250000 | Uiso | 0.012700 | C |
| C14 | 1.0 | 0.165600 | 0.972000 | 0.250000 | Uiso | 0.012700 | C |
| C15 | 1.0 | 0.711200 | 0.702000 | 0.250000 | Uiso | 0.012700 | C |
| C16 | 1.0 | 0.288800 | 0.298000 | 0.250000 | Uiso | 0.012700 | C |
| C17 | 1.0 | 0.759100 | 0.870000 | 0.250000 | Uiso | 0.012700 | C |
| C18 | 1.0 | 0.240900 | 0.130000 | 0.250000 | Uiso | 0.012700 | C |
| C19 | 1.0 | 0.625700 | 0.852000 | 0.250000 | Uiso | 0.012700 | C |
| C20 | 1.0 | 0.374300 | 0.148000 | 0.250000 | Uiso | 0.012700 | C |
| C21 | 1.0 | 0.478000 | 0.817000 | 0.250000 | Uiso | 0.012700 | C |
| C22 | 1.0 | 0.522000 | 0.183000 | 0.250000 | Uiso | 0.012700 | C |
| C23 | 1.0 | 0.562500 | 0.680000 | 0.250000 | Uiso | 0.012700 | C |
| C24 | 1.0 | 0.437500 | 0.320000 | 0.250000 | Uiso | 0.012700 | C |
| H1  | 1.0 | 0.874900 | 0.889100 | 0.250000 | Uiso | 0.012700 | H |
| H2  | 1.0 | 0.125100 | 0.110900 | 0.250000 | Uiso | 0.012700 | H |
| H3  | 1.0 | 0.385300 | 0.610900 | 0.250000 | Uiso | 0.012700 | H |
| H4  | 1.0 | 0.614700 | 0.389100 | 0.250000 | Uiso | 0.012700 | H |

|     |     |          |          |          |      |          |   |
|-----|-----|----------|----------|----------|------|----------|---|
| H5  | 1.0 | 0.916500 | 0.557600 | 0.250000 | Uiso | 0.012700 | H |
| H6  | 1.0 | 0.083500 | 0.442400 | 0.250000 | Uiso | 0.012700 | H |
| H7  | 1.0 | 0.407300 | 0.942400 | 0.250000 | Uiso | 0.012700 | H |
| H8  | 1.0 | 0.592700 | 0.057600 | 0.250000 | Uiso | 0.012700 | H |
| H9  | 1.0 | 0.358300 | 0.821700 | 0.250000 | Uiso | 0.012700 | H |
| H10 | 1.0 | 0.641700 | 0.178300 | 0.250000 | Uiso | 0.012700 | H |
| H11 | 1.0 | 0.867400 | 0.678300 | 0.250000 | Uiso | 0.012700 | H |
| H12 | 1.0 | 0.132600 | 0.321700 | 0.250000 | Uiso | 0.012700 | H |
| N1  | 1.0 | 0.142200 | 0.762000 | 0.250000 | Uiso | 0.012700 | N |
| N2  | 1.0 | 0.857800 | 0.238000 | 0.250000 | Uiso | 0.012700 | N |
| N3  | 1.0 | 0.088200 | 0.935000 | 0.250000 | Uiso | 0.012700 | N |
| N4  | 1.0 | 0.911800 | 0.065000 | 0.250000 | Uiso | 0.012700 | N |
| N5  | 1.0 | 0.226700 | 0.904000 | 0.250000 | Uiso | 0.012700 | N |
| N6  | 1.0 | 0.773300 | 0.096000 | 0.250000 | Uiso | 0.012700 | N |
| N7  | 1.0 | 0.282700 | 0.733000 | 0.250000 | Uiso | 0.012700 | N |
| N8  | 1.0 | 0.717300 | 0.267000 | 0.250000 | Uiso | 0.012700 | N |
| N9  | 1.0 | 0.198200 | 0.588000 | 0.250000 | Uiso | 0.012700 | N |
| N10 | 1.0 | 0.801800 | 0.412000 | 0.250000 | Uiso | 0.012700 | N |
| N11 | 1.0 | 0.057600 | 0.608000 | 0.250000 | Uiso | 0.012700 | N |
| N12 | 1.0 | 0.942300 | 0.392000 | 0.250000 | Uiso | 0.012700 | N |
| N13 | 1.0 | 0.997300 | 0.788000 | 0.250000 | Uiso | 0.012700 | N |
| N14 | 1.0 | 0.002700 | 0.212000 | 0.250000 | Uiso | 0.012700 | N |
| N15 | 1.0 | 0.333600 | 0.568000 | 0.250000 | Uiso | 0.012700 | N |
| N16 | 1.0 | 0.666400 | 0.432000 | 0.250000 | Uiso | 0.012700 | N |
| N17 | 1.0 | 0.921000 | 0.638000 | 0.250000 | Uiso | 0.012700 | N |
| N18 | 1.0 | 0.079000 | 0.362000 | 0.250000 | Uiso | 0.012700 | N |
| N19 | 1.0 | 0.631800 | 0.738000 | 0.250000 | Uiso | 0.012700 | N |
| N20 | 1.0 | 0.368200 | 0.262000 | 0.250000 | Uiso | 0.012700 | N |
| N21 | 1.0 | 0.577800 | 0.565000 | 0.250000 | Uiso | 0.012700 | N |
| N22 | 1.0 | 0.422200 | 0.435000 | 0.250000 | Uiso | 0.012700 | N |

|     |     |          |          |          |      |          |   |
|-----|-----|----------|----------|----------|------|----------|---|
| N23 | 1.0 | 0.716300 | 0.596000 | 0.250000 | Uiso | 0.012700 | N |
| N24 | 1.0 | 0.283700 | 0.404000 | 0.250000 | Uiso | 0.012700 | N |
| N25 | 1.0 | 0.772300 | 0.767000 | 0.250000 | Uiso | 0.012700 | N |
| N26 | 1.0 | 0.227700 | 0.233000 | 0.250000 | Uiso | 0.012700 | N |
| N27 | 1.0 | 0.687800 | 0.912000 | 0.250000 | Uiso | 0.012700 | N |
| N28 | 1.0 | 0.312200 | 0.088000 | 0.250000 | Uiso | 0.012700 | N |
| N29 | 1.0 | 0.547300 | 0.892000 | 0.250000 | Uiso | 0.012700 | N |
| N30 | 1.0 | 0.452700 | 0.108000 | 0.250000 | Uiso | 0.012700 | N |
| N31 | 1.0 | 0.488200 | 0.712000 | 0.250000 | Uiso | 0.012700 | N |
| N32 | 1.0 | 0.511800 | 0.288000 | 0.250000 | Uiso | 0.012700 | N |
| N33 | 1.0 | 0.823200 | 0.932000 | 0.250000 | Uiso | 0.012700 | N |
| N34 | 1.0 | 0.176800 | 0.068000 | 0.250000 | Uiso | 0.012700 | N |
| N35 | 1.0 | 0.411800 | 0.862000 | 0.250000 | Uiso | 0.012700 | N |
| N36 | 1.0 | 0.588200 | 0.138000 | 0.250000 | Uiso | 0.012700 | N |



### 3. gCN P21212\_600C

#=====

# CRYSTAL DATA

#-----

data\_gCNyHz P21212\_600C

\_chemical\_name\_common            "  
\_cell\_length\_a                    16.35100  
\_cell\_length\_b                    12.30900  
\_cell\_length\_c                    6.43790  
\_cell\_angle\_alpha                 90  
\_cell\_angle\_beta                  90  
\_cell\_angle\_gamma                 90  
\_space\_group\_name\_H-M\_alt         'P 21 21 2'  
\_space\_group\_IT\_number            18

loop\_

\_space\_group\_symop\_operation\_xyz

'x, y, z'

'-x, -y, z'

'-x+1/2, y+1/2, -z'

'x+1/2, -y+1/2, -z'

loop\_

\_atom\_site\_label

\_atom\_site\_occupancy

\_atom\_site\_fract\_x

\_atom\_site\_fract\_y

\_atom\_site\_fract\_z

\_atom\_site\_adp\_type

\_atom\_site\_U\_iso\_or\_equiv

\_atom\_site\_type\_symbol

|     |     |          |          |          |      |          |   |
|-----|-----|----------|----------|----------|------|----------|---|
| C1  | 1.0 | 0.344800 | 0.472000 | 0.250000 | Uiso | 0.012700 | C |
| C2  | 1.0 | 0.655200 | 0.528000 | 0.250000 | Uiso | 0.012700 | C |
| C3  | 1.0 | 0.221600 | 0.798000 | 0.250000 | Uiso | 0.012700 | C |
| C4  | 1.0 | 0.778400 | 0.202000 | 0.250000 | Uiso | 0.012700 | C |
| C5  | 1.0 | 0.269500 | 0.630000 | 0.250000 | Uiso | 0.012700 | C |
| C6  | 1.0 | 0.730500 | 0.370000 | 0.250000 | Uiso | 0.012700 | C |
| C7  | 1.0 | 0.136100 | 0.648000 | 0.250000 | Uiso | 0.012700 | C |
| C8  | 1.0 | 0.864000 | 0.352000 | 0.250000 | Uiso | 0.012700 | C |
| C9  | 1.0 | 0.987200 | 0.683000 | 0.250000 | Uiso | 0.012700 | C |
| C10 | 1.0 | 0.012800 | 0.317000 | 0.250000 | Uiso | 0.012700 | C |
| C11 | 1.0 | 0.072900 | 0.820000 | 0.250000 | Uiso | 0.012700 | C |
| C12 | 1.0 | 0.927100 | 0.180000 | 0.250000 | Uiso | 0.012700 | C |
| C13 | 1.0 | 0.834400 | 0.028000 | 0.250000 | Uiso | 0.012700 | C |
| C14 | 1.0 | 0.165600 | 0.972000 | 0.250000 | Uiso | 0.012700 | C |
| C15 | 1.0 | 0.711200 | 0.702000 | 0.250000 | Uiso | 0.012700 | C |
| C16 | 1.0 | 0.288800 | 0.298000 | 0.250000 | Uiso | 0.012700 | C |
| C17 | 1.0 | 0.759100 | 0.870000 | 0.250000 | Uiso | 0.012700 | C |
| C18 | 1.0 | 0.240900 | 0.130000 | 0.250000 | Uiso | 0.012700 | C |
| C19 | 1.0 | 0.625700 | 0.852000 | 0.250000 | Uiso | 0.012700 | C |
| C20 | 1.0 | 0.374300 | 0.148000 | 0.250000 | Uiso | 0.012700 | C |
| C21 | 1.0 | 0.478000 | 0.817000 | 0.250000 | Uiso | 0.012700 | C |
| C22 | 1.0 | 0.522000 | 0.183000 | 0.250000 | Uiso | 0.012700 | C |
| C23 | 1.0 | 0.562500 | 0.680000 | 0.250000 | Uiso | 0.012700 | C |
| C24 | 1.0 | 0.437500 | 0.320000 | 0.250000 | Uiso | 0.012700 | C |
| H1  | 1.0 | 0.874900 | 0.889100 | 0.250000 | Uiso | 0.012700 | H |
| H2  | 1.0 | 0.125100 | 0.110900 | 0.250000 | Uiso | 0.012700 | H |
| H3  | 1.0 | 0.385300 | 0.610900 | 0.250000 | Uiso | 0.012700 | H |
| H4  | 1.0 | 0.614700 | 0.389100 | 0.250000 | Uiso | 0.012700 | H |

---

|     |     |          |          |          |      |          |   |
|-----|-----|----------|----------|----------|------|----------|---|
| H5  | 1.0 | 0.916500 | 0.557600 | 0.250000 | Uiso | 0.012700 | H |
| H6  | 1.0 | 0.083500 | 0.442400 | 0.250000 | Uiso | 0.012700 | H |
| H7  | 1.0 | 0.407300 | 0.942400 | 0.250000 | Uiso | 0.012700 | H |
| H8  | 1.0 | 0.592700 | 0.057600 | 0.250000 | Uiso | 0.012700 | H |
| H9  | 1.0 | 0.358300 | 0.821700 | 0.250000 | Uiso | 0.012700 | H |
| H10 | 1.0 | 0.641700 | 0.178300 | 0.250000 | Uiso | 0.012700 | H |
| H11 | 1.0 | 0.867400 | 0.678300 | 0.250000 | Uiso | 0.012700 | H |
| H12 | 1.0 | 0.132600 | 0.321700 | 0.250000 | Uiso | 0.012700 | H |
| N1  | 1.0 | 0.142200 | 0.762000 | 0.250000 | Uiso | 0.012700 | N |
| N2  | 1.0 | 0.857800 | 0.238000 | 0.250000 | Uiso | 0.012700 | N |
| N3  | 1.0 | 0.088200 | 0.935000 | 0.250000 | Uiso | 0.012700 | N |
| N4  | 1.0 | 0.911800 | 0.065000 | 0.250000 | Uiso | 0.012700 | N |
| N5  | 1.0 | 0.226700 | 0.904000 | 0.250000 | Uiso | 0.012700 | N |
| N6  | 1.0 | 0.773300 | 0.096000 | 0.250000 | Uiso | 0.012700 | N |
| N7  | 1.0 | 0.282700 | 0.733000 | 0.250000 | Uiso | 0.012700 | N |
| N8  | 1.0 | 0.717300 | 0.267000 | 0.250000 | Uiso | 0.012700 | N |
| N9  | 1.0 | 0.198200 | 0.588000 | 0.250000 | Uiso | 0.012700 | N |
| N10 | 1.0 | 0.801800 | 0.412000 | 0.250000 | Uiso | 0.012700 | N |
| N11 | 1.0 | 0.057600 | 0.608000 | 0.250000 | Uiso | 0.012700 | N |
| N12 | 1.0 | 0.942300 | 0.392000 | 0.250000 | Uiso | 0.012700 | N |
| N13 | 1.0 | 0.997300 | 0.788000 | 0.250000 | Uiso | 0.012700 | N |
| N14 | 1.0 | 0.002700 | 0.212000 | 0.250000 | Uiso | 0.012700 | N |
| N15 | 1.0 | 0.333600 | 0.568000 | 0.250000 | Uiso | 0.012700 | N |
| N16 | 1.0 | 0.666400 | 0.432000 | 0.250000 | Uiso | 0.012700 | N |
| N17 | 1.0 | 0.921000 | 0.638000 | 0.250000 | Uiso | 0.012700 | N |
| N18 | 1.0 | 0.079000 | 0.362000 | 0.250000 | Uiso | 0.012700 | N |
| N19 | 1.0 | 0.631800 | 0.738000 | 0.250000 | Uiso | 0.012700 | N |
| N20 | 1.0 | 0.368200 | 0.262000 | 0.250000 | Uiso | 0.012700 | N |
| N21 | 1.0 | 0.577800 | 0.565000 | 0.250000 | Uiso | 0.012700 | N |
| N22 | 1.0 | 0.422200 | 0.435000 | 0.250000 | Uiso | 0.012700 | N |

|     |     |          |          |          |      |          |   |
|-----|-----|----------|----------|----------|------|----------|---|
| N23 | 1.0 | 0.716300 | 0.596000 | 0.250000 | Uiso | 0.012700 | N |
| N24 | 1.0 | 0.283700 | 0.404000 | 0.250000 | Uiso | 0.012700 | N |
| N25 | 1.0 | 0.772300 | 0.767000 | 0.250000 | Uiso | 0.012700 | N |
| N26 | 1.0 | 0.227700 | 0.233000 | 0.250000 | Uiso | 0.012700 | N |
| N27 | 1.0 | 0.687800 | 0.912000 | 0.250000 | Uiso | 0.012700 | N |
| N28 | 1.0 | 0.312200 | 0.088000 | 0.250000 | Uiso | 0.012700 | N |
| N29 | 1.0 | 0.547300 | 0.892000 | 0.250000 | Uiso | 0.012700 | N |
| N30 | 1.0 | 0.452700 | 0.108000 | 0.250000 | Uiso | 0.012700 | N |
| N31 | 1.0 | 0.488200 | 0.712000 | 0.250000 | Uiso | 0.012700 | N |
| N32 | 1.0 | 0.511800 | 0.288000 | 0.250000 | Uiso | 0.012700 | N |
| N33 | 1.0 | 0.823200 | 0.932000 | 0.250000 | Uiso | 0.012700 | N |
| N34 | 1.0 | 0.176800 | 0.068000 | 0.250000 | Uiso | 0.012700 | N |
| N35 | 1.0 | 0.411800 | 0.862000 | 0.250000 | Uiso | 0.012700 | N |
| N36 | 1.0 | 0.588200 | 0.138000 | 0.250000 | Uiso | 0.012700 | N |

#### 4. gCN P-6m2\_500

#=====

# CRYSTAL DATA

#-----

data\_gC3N4 P-6m2\_500

|                           |            |
|---------------------------|------------|
| _chemical_name_common     | "          |
| _cell_length_a            | 7.96700    |
| _cell_length_b            | 7.96700    |
| _cell_length_c            | 6.5117     |
| _cell_angle_alpha         | 90         |
| _cell_angle_beta          | 90         |
| _cell_angle_gamma         | 120        |
| _space_group_name_H-M_alt | 'P -6 m 2' |
| _space_group_IT_number    | 187        |

loop\_

\_space\_group\_symop\_operation\_xyz

'x, y, z'

'-y, x-y, z'

'-x+y, -x, z'

'x, y, -z'

'-y, x-y, -z'

'-x+y, -x, -z'

'-y, -x, z'

'-x+y, y, z'

'x, x-y, z'

'-y, -x, -z'

'-x+y, y, -z'

'x, x-y, -z'

loop\_

\_atom\_site\_label

\_atom\_site\_occupancy

\_atom\_site\_fract\_x

\_atom\_site\_fract\_y

\_atom\_site\_fract\_z

\_atom\_site\_adp\_type

\_atom\_site\_U\_iso\_or\_equiv

\_atom\_site\_type\_symbol

|     |     |          |          |          |      |          |   |
|-----|-----|----------|----------|----------|------|----------|---|
| N1  | 1.0 | 0.000000 | 0.000000 | 0.000000 | Uiso | 0.012700 | N |
| N7  | 1.0 | 0.666667 | 0.666667 | 0.000000 | Uiso | 1.000000 | N |
| N5  | 1.0 | 0.666667 | 0.333333 | 0.000000 | Uiso | 1.000000 | N |
| N10 | 1.0 | 0.333333 | 0.333333 | 0.500000 | Uiso | 0.012700 | N |
| N13 | 1.0 | 0.333333 | 0.666667 | 0.500000 | Uiso | 0.012700 | N |
| N11 | 1.0 | 0.666667 | 0.333333 | 0.500000 | Uiso | 0.012700 | N |
| N9  | 1.0 | 0.333333 | 0.333333 | 0.000000 | Uiso | 0.012700 | N |
| N12 | 1.0 | 0.666667 | 0.666667 | 0.500000 | Uiso | 0.012700 | N |
| C1  | 1.0 | 0.222200 | 0.111100 | 0.000000 | Uiso | 0.012700 | C |
| C2  | 1.0 | 0.555500 | 0.111100 | 0.000000 | Uiso | 0.012700 | C |
| C7  | 1.0 | 0.222200 | 0.444400 | 0.500000 | Uiso | 0.012700 | C |
| C8  | 1.0 | 0.555500 | 0.444400 | 0.500000 | Uiso | 0.012700 | C |

## 5. gCN P-6m2\_550

#=====

# CRYSTAL DATA

#-----

data\_gC3N4 P-6m2\_550

|                           |            |
|---------------------------|------------|
| _chemical_name_common     | "          |
| _cell_length_a            | 7.93800    |
| _cell_length_b            | 7.93800    |
| _cell_length_c            | 6.4725     |
| _cell_angle_alpha         | 90         |
| _cell_angle_beta          | 90         |
| _cell_angle_gamma         | 120        |
| _space_group_name_H-M_alt | 'P -6 m 2' |
| _space_group_IT_number    | 187        |

loop\_

\_space\_group\_symop\_operation\_xyz

'x, y, z'

'-y, x-y, z'

'-x+y, -x, z'

'x, y, -z'

'-y, x-y, -z'

'-x+y, -x, -z'

'-y, -x, z'

'-x+y, y, z'

'x, x-y, z'

'-y, -x, -z'

'-x+y, y, -z'

'x, x-y, -z'

loop\_

\_atom\_site\_label

\_atom\_site\_occupancy

\_atom\_site\_fract\_x

\_atom\_site\_fract\_y

\_atom\_site\_fract\_z

\_atom\_site\_adp\_type

\_atom\_site\_U\_iso\_or\_equiv

\_atom\_site\_type\_symbol

|     |     |          |          |          |      |          |   |
|-----|-----|----------|----------|----------|------|----------|---|
| N1  | 1.0 | 0.000000 | 0.000000 | 0.000000 | Uiso | 0.012700 | N |
| N7  | 1.0 | 0.666667 | 0.666667 | 0.000000 | Uiso | 1.000000 | N |
| N5  | 1.0 | 0.666667 | 0.333333 | 0.000000 | Uiso | 1.000000 | N |
| N10 | 1.0 | 0.333333 | 0.333333 | 0.500000 | Uiso | 0.012700 | N |
| N13 | 1.0 | 0.333333 | 0.666667 | 0.500000 | Uiso | 0.012700 | N |
| N11 | 1.0 | 0.666667 | 0.333333 | 0.500000 | Uiso | 0.012700 | N |
| N9  | 1.0 | 0.333333 | 0.333333 | 0.000000 | Uiso | 0.012700 | N |
| N12 | 1.0 | 0.666667 | 0.666667 | 0.500000 | Uiso | 0.012700 | N |
| C1  | 1.0 | 0.222200 | 0.111100 | 0.000000 | Uiso | 0.012700 | C |
| C2  | 1.0 | 0.555500 | 0.111100 | 0.000000 | Uiso | 0.012700 | C |
| C7  | 1.0 | 0.222200 | 0.444400 | 0.500000 | Uiso | 0.012700 | C |
| C8  | 1.0 | 0.555500 | 0.444400 | 0.500000 | Uiso | 0.012700 | C |



## 6. gCN P-6m2\_600

#=====

# CRYSTAL DATA

#-----

data\_gC3N4 P-6m2\_600

|                           |            |
|---------------------------|------------|
| _chemical_name_common     | "          |
| _cell_length_a            | 7.94600    |
| _cell_length_b            | 7.94600    |
| _cell_length_c            | 6.4420     |
| _cell_angle_alpha         | 90         |
| _cell_angle_beta          | 90         |
| _cell_angle_gamma         | 120        |
| _space_group_name_H-M_alt | 'P -6 m 2' |
| _space_group_IT_number    | 187        |

loop\_

\_space\_group\_symop\_operation\_xyz

'x, y, z'  
'-y, x-y, z'  
'-x+y, -x, z'  
'x, y, -z'  
'-y, x-y, -z'  
'-x+y, -x, -z'  
'-y, -x, z'  
'-x+y, y, z'  
'x, x-y, z'  
'-y, -x, -z'  
'-x+y, y, -z'  
'x, x-y, -z'

loop\_

\_atom\_site\_label

\_atom\_site\_occupancy

\_atom\_site\_fract\_x

\_atom\_site\_fract\_y

\_atom\_site\_fract\_z

\_atom\_site\_adp\_type

\_atom\_site\_U\_iso\_or\_equiv

\_atom\_site\_type\_symbol

|     |     |          |          |          |      |          |   |
|-----|-----|----------|----------|----------|------|----------|---|
| N1  | 1.0 | 0.000000 | 0.000000 | 0.000000 | Uiso | 0.012700 | N |
| N7  | 1.0 | 0.666667 | 0.666667 | 0.000000 | Uiso | 1.000000 | N |
| N5  | 1.0 | 0.666667 | 0.333333 | 0.000000 | Uiso | 1.000000 | N |
| N10 | 1.0 | 0.333333 | 0.333333 | 0.500000 | Uiso | 0.012700 | N |
| N13 | 1.0 | 0.333333 | 0.666667 | 0.500000 | Uiso | 0.012700 | N |
| N11 | 1.0 | 0.666667 | 0.333333 | 0.500000 | Uiso | 0.012700 | N |
| N9  | 1.0 | 0.333333 | 0.333333 | 0.000000 | Uiso | 0.012700 | N |
| N12 | 1.0 | 0.666667 | 0.666667 | 0.500000 | Uiso | 0.012700 | N |
| C1  | 1.0 | 0.222200 | 0.111100 | 0.000000 | Uiso | 0.012700 | C |
| C2  | 1.0 | 0.555500 | 0.111100 | 0.000000 | Uiso | 0.012700 | C |
| C7  | 1.0 | 0.222200 | 0.444400 | 0.500000 | Uiso | 0.012700 | C |
| C8  | 1.0 | 0.555500 | 0.444400 | 0.500000 | Uiso | 0.012700 | C |

---
